1 **FTO suppresses STAT3 activation and modulates proinflammatory interferon-stimulated**  
2 **gene expression**

3  
4 Michael J. McFadden<sup>1,a\*</sup>, Matthew T. Sacco<sup>1\*</sup>, Kristen A. Murphy<sup>1</sup>, Moonhee Park<sup>1</sup>, Nandan S.  
5 Gokhale<sup>2</sup>, Kim Y. Somfleth<sup>2</sup>, Stacy M. Horner<sup>†1,3</sup>

6  
7 **Affiliations:**

8 <sup>1</sup> Department of Molecular Genetics and Microbiology, Duke University Medical Center,  
9 Durham, NC 27710, USA.

10 Michael J. McFadden; mcfaddmj@umich.edu, Matthew T. Sacco;  
11 matthew.sacco@duke.edu, Kristen A. Murphy; kristen.a.murphy@duke.edu, Moonhee  
12 Park; moonhee.park@duke.edu, Stacy M. Horner; stacy.horner@duke.edu

13 <sup>2</sup> Department of Immunology, University of Washington, Seattle, WA 98109, USA.  
14 Nandan S. Gokhale; ngokhale@uw.edu, Kim Y. Somfleth; ksomf@uw.edu

15 <sup>3</sup> Department of Medicine, Duke University Medical Center, Durham, NC 27710, USA.

16  
17  
18 **Current address:**

19 <sup>a</sup> Department of Microbiology and Immunology, University of Michigan, Ann Arbor, MI  
20 48109, USA.

21  
22  
23  
24  
25 \* These authors contributed equally

26  
27 † Corresponding author

28 Correspondence to Stacy M. Horner (stacy.horner@duke.edu)

## 29 **Abstract**

30        Signaling initiated by type I interferon (IFN) results in the induction of hundreds of IFN-  
31 stimulated genes (ISGs). The type I IFN response is important for antiviral restriction, but aberrant  
32 activation of this response can lead to inflammation and autoimmunity. Regulation of this  
33 response is incompletely understood. We previously reported that the mRNA modification m<sup>6</sup>A  
34 and its deposition enzymes, METTL3 and METTL14 (METTL3/14), promote the type I IFN  
35 response by directly modifying the mRNA of a subset of ISGs to enhance their translation. Here,  
36 we determined the role of the RNA demethylase FTO in the type I IFN response. FTO, which can  
37 remove either m<sup>6</sup>A or the cap-adjacent m<sup>6</sup>Am RNA modifications, has previously been associated  
38 with obesity and body mass index, type 2 diabetes, cardiovascular disease, and inflammation.  
39 We found that FTO suppresses the transcription of a distinct set of ISGs, including many known  
40 pro-inflammatory genes, and that this regulation is not through the actions of FTO on m<sup>6</sup>Am.  
41 Further, we found that depletion of FTO led to activation of STAT3, a transcription factor that  
42 mediates responses to various cytokines, but whose role in the type I IFN response is not well  
43 understood. This activation of STAT3 increased the expression of a subset of ISGs. Importantly,  
44 this increased ISG induction resulting from FTO depletion was partially ablated by depletion of  
45 STAT3. Together, these results reveal that FTO negatively regulates STAT3-mediated signaling  
46 that induces proinflammatory ISGs during the IFN response, highlighting an important role for  
47 FTO in suppression of inflammatory genes.

48  
49 **Keywords:** Fat mass and obesity-associated (FTO); N6-methyladenosine (m<sup>6</sup>A); Interferon (IFN);  
50 Interferon-stimulated gene (ISG); Inflammation

51

## 52 **Introduction**

53        The type I interferon (IFN) response induces the expression of hundreds of IFN-stimulated  
54 genes (ISGs), many of which have antiviral and proinflammatory functions, and thus is crucial for  
55 the early response to viral infection [1]. Type I IFNs signal through a dimeric receptor composed  
56 of IFNAR1 and IFNAR2 to activate the transcription factors STAT1 and STAT2, which  
57 heterodimerize with IRF9 to form the transcription factor complex ISGF3 [2]. ISGF3 then binds to  
58 the promoters of ISGs to induce their transcription, resulting in the establishment an antiviral  
59 cellular state [3]. While transcriptional induction of ISGs by ISGF3 is the primary driver of the type  
60 I IFN response, regulation of this response by other transcription factors or by post-transcriptional  
61 controls is incompletely understood. Specifically, the functions of the transcription factor STAT3  
62 in the type I IFN response are not clear, although it has been shown to have functions either in

63 suppressing this response or promoting the expression of certain ISGs, likely in a cell type-specific  
64 fashion [4]. We previously established that the addition of the mRNA modification m<sup>6</sup>A to a subset  
65 of ISGs by the m<sup>6</sup>A-methyltransferase complex proteins METTL3 and METTL14 (METTL3/14)  
66 increases their translation by recruiting the m<sup>6</sup>A-binding protein YTHDF1 and that this promotes  
67 an antiviral cellular state [5]. However, the role of the m<sup>6</sup>A demethylase FTO in the type I IFN  
68 response has not yet been described. The functions of FTO are important for several aspects of  
69 human health, and genetic variants of this gene are associated with obesity and body mass index,  
70 type 2 diabetes, cardiovascular disease, and inflammation [6-9]. Despite its essential functions  
71 for human development and health [10], the mechanisms by which FTO regulates these biological  
72 processes are incompletely understood.

73 A major molecular function of FTO, which has sequence homology to alpha-ketoglutarate  
74 oxygenase enzymes such as the AlkB homolog family (ALKBH) proteins, is RNA demethylation  
75 [11]. Importantly, FTO has been shown to be involved in the demethylation of both m<sup>6</sup>A [12], a  
76 function shared by ALKBH5 [13], and the cap-adjacent m<sup>6</sup>Am modification [14]. m<sup>6</sup>A is deposited  
77 by a complex of proteins, including METTL3/14 and others [15], and can regulate many aspects  
78 of RNA metabolism, including degradation and translation, among other processes [16-19]. m<sup>6</sup>Am  
79 addition is catalyzed by the enzyme PCIF1 at the first transcribed nucleotide in an mRNA and  
80 may be involved in regulating mRNA stability and translation [20-22]. Through its RNA  
81 demethylase functions, FTO can regulate many cellular and biological processes, including  
82 neurogenesis, dopamine signaling and appetite regulation, adipogenesis, oncogenesis, and viral  
83 infection [23-29]. Interestingly, FTO depletion was recently shown to sensitize melanoma cells to  
84 IFN-γ treatment, suggesting a role for FTO in the response to IFNs [28]. Further, FTO has been  
85 shown to regulate infection by a number of viruses, presumably by demethylating viral RNA [29],  
86 but its role in regulation of host responses to viral infection has not been elucidated. Therefore,  
87 we sought to define the role of FTO in the type I IFN response.

88 Here, we found that depletion of FTO results in increased production of a subset of ISGs.  
89 However, whereas METTL3/14 promotes the translation of a subset of ISGs without affecting their  
90 mRNA levels [5], FTO regulates a distinct subset of ISGs at the mRNA level. By labeling nascent  
91 RNA, we found that FTO inhibits the transcription of these ISGs and that FTO-depleted cells are  
92 primed to respond to type I IFN. FTO regulation of ISGs is not through demethylation of m<sup>6</sup>Am,  
93 as deletion of the m<sup>6</sup>Am writer enzyme PCIF1 did not impact the phenotypic effect of FTO  
94 depletion on ISG expression. Interestingly, we found that FTO depletion results in increased  
95 phosphorylation and thus activation of transcription factor STAT3. Additionally, STAT3 activation  
96 through treatment with the cytokine IL6 or expression of the *Salmonella* effector protein SarA,

97 known to induce STAT3 phosphorylation, recapitulated the phenotypic effects of STAT3 activation  
98 by FTO depletion [30, 31], suggesting that suppression of STAT3 activation by FTO represses  
99 transcription of a specific subset of ISGs. In support of this hypothesis, depletion of STAT3 led to  
100 partial ablation of FTO-mediated suppression of ISG induction. Taken together, these results  
101 reveal a novel role for FTO in the transcriptional suppression of STAT3-regulated ISGs, which  
102 has important implications for our understanding of the role of FTO in disease.

103

## 104 **Results**

### 105 **FTO regulates the mRNA expression of a subset of ISGs.**

106 Having previously shown that the m<sup>6</sup>A-methyltransferase complex proteins METTL3/14  
107 promote the translation of specific ISGs via the addition of m<sup>6</sup>A to these ISGs [5], we hypothesized  
108 that the major m<sup>6</sup>A-demethylase FTO would suppress the translation of these ISGs by removal of  
109 m<sup>6</sup>A. To test this hypothesis, we used siRNAs to deplete METTL3/14 or FTO in Huh7 cells and  
110 induced the expression of ISGs by treatment with IFN- $\beta$ , a type I IFN. Similar to our previous  
111 results, depletion of METTL3/14 resulted in reduced protein levels of IFITM1, GBP1, IFIT3, and  
112 MX1 [5]. Depletion of FTO showed the opposite result in that its depletion resulted in increased  
113 protein expression of the METTL3/14-regulated ISGs, except for MX1 whose expression was only  
114 modestly affected by METTL3/14 depletion and not altered by FTO depletion (Figure 1A). As  
115 before, the ISGs ISG15 and EIF2AK2 were unaffected by METTL3/14 depletion, and here we  
116 also found that their IFN-induced expression was unaffected by FTO depletion (Figure 1A). We  
117 next determined whether FTO depletion changed the mRNA induction of these ISGs.  
118 Interestingly, while METTL3/14 depletion did not impact the mRNA levels of these ISGs, as  
119 expected [5], FTO depletion did increase the mRNA levels of the regulated ISGs, including  
120 *IFITM1*, *GBP1*, and *IFIT3* (Figure 1B). These results show that FTO negatively regulates specific  
121 ISGs at the mRNA level. Thus, the mechanism underlying the regulatory role of FTO on ISGs is  
122 distinct from METTL3/14.

123

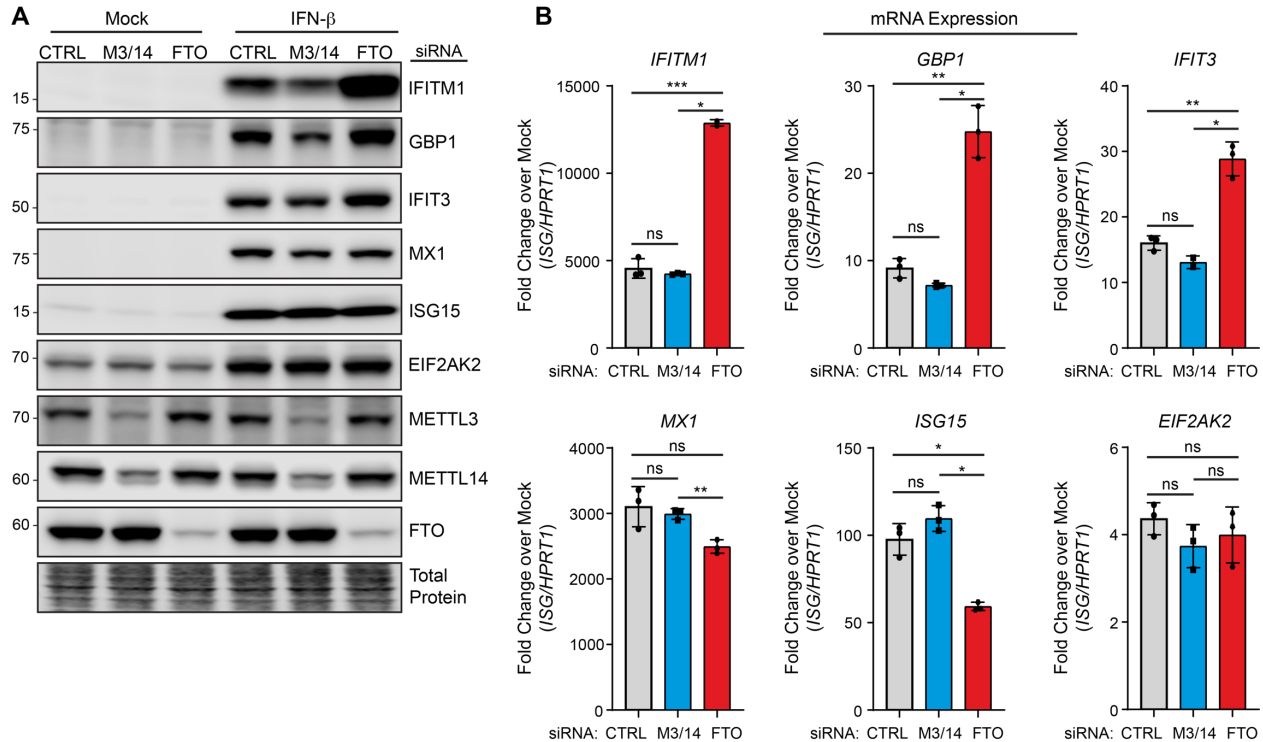

124 **Figure 1: FTO regulates the mRNA expression of a subset of ISGs.** (A) Immunoblot analysis  
 125 of extracts from Huh7 cells transfected with siRNAs to control (CTRL), METTL3/14 (M3/14), or  
 126 FTO prior to mock or IFN-β (12 h) treatment. Data are representative of 3 biological experiments.  
 127 (B) RT-qPCR analysis of ISG induction normalized to *HPRT1* following IFN-β treatment (12 hours)  
 128 of Huh7 cells treated with non-targeting control (CTRL) or METTL3/14 siRNA plotted as fold  
 129 change over mock treatment for each ISG. Values are the mean ± SD of 3 technical replicates,  
 130 representative of 3 biological experiments. \* p < 0.05, \*\* p < 0.01, \*\*\* p < 0.005 by one way  
 131 ANOVA with Dunnett's multiple comparisons test.

132

### 133 FTO regulates the transcription of certain ISGs.

134 To determine how FTO regulates the mRNA expression of ISGs, we pulsed siCTRL,  
 135 siMETTL3/14, or siFTO-treated cells with 4-thiouridine (4-sU) and IFN-β for 1 hour to  
 136 metabolically label nascent transcripts produced by IFN stimulation. We then purified the nascent  
 137 RNA and performed RT-qPCR to quantify relative transcription. These experiments revealed that  
 138 depletion of FTO led to a marked increase of the transcription of the FTO-regulated ISG *IFITM1*  
 139 during the pulse. Interestingly, the transcription of the non-FTO-regulated ISGs *ISG15* and  
 140 *EIF2AK2* were also slightly increased by FTO depletion (Figure 2A). METTL3/14 depletion did  
 141 not affect the transcription of these ISGs nor a known m<sup>6</sup>A-modified gene, *CREBBP*, whose  
 142 stability is regulated by m<sup>6</sup>A [16] (Figure 2A). Next, to determine how FTO regulates the  
 143 transcription of ISGs over time, we performed the 4-sU and IFN-β pulses at both 1 and 12 hours

144 in siRNA-treated cells and quantified the transcription of a broader set of ISGs by RT-qPCR  
 145 (Figure 2B). Similar to the results shown in Figure 2A, following the 1 hour 4-sU and IFN- $\beta$  pulses  
 146 nearly all ISGs tested (*IFITM1*, *GBP1*, *IFIT3*, *MX1*, *ISG15*, and *EIF2AK2*) displayed some  
 147 increased transcription following FTO depletion. However, following the 12 hour 4-sU and IFN- $\beta$   
 148 pulses, only *IFITM1*, *GBP1*, and *IFIT3* still had increased transcription, while the non-FTO  
 149 regulated ISGs *MX1*, *ISG15*, and *EIF2AK2* did not (Figure 1B; Figure 2B). These data indicate  
 150 that FTO depletion primes cells to respond to IFN- $\beta$ , as they transcribe ISGs more rapidly, but  
 151 this early transcriptional upregulation only persist for a subset of ISGs.  
 152

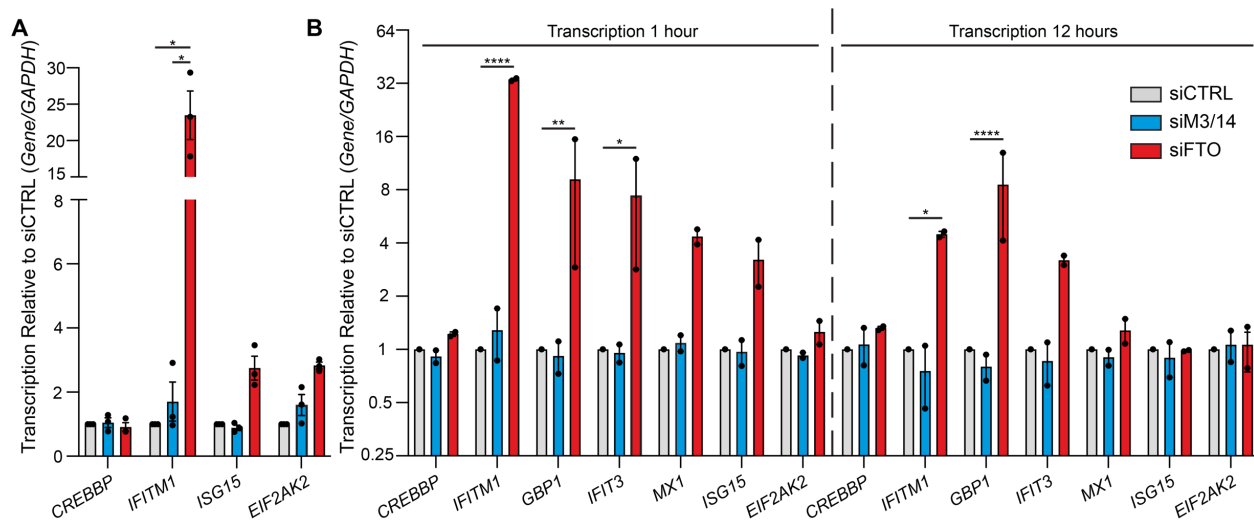

153 **Figure 2: FTO regulates the transcription of ISGs. (A-B)** Relative transcription analysis of  
 154 Huh7 cells treated with siRNAs to control (CTRL), METTL3/14 (M3/14), or FTO prior to mock or  
 155 IFN- $\beta$  treatment + 4-sU pulse labeling for 1 hour (A) or 1 and 12 hours (B). Values are the mean  
 156  $\pm$  SEM of 3 (A) or 2 (B) biological experiments. \*  $P < 0.01$ ; all other comparisons not significant  
 157 ( $P > 0.05$ ) by 2-way ANOVA with Tukey's multiple comparisons.

158

### 159 **FTO regulation of ISGs occurs independently of m<sup>6</sup>Am.**

160 FTO can catalyze the removal of both m<sup>6</sup>A and m<sup>6</sup>Am [12, 14]. To determine if FTO acts  
 161 on m<sup>6</sup>Am or on m<sup>6</sup>A to suppress the expression of ISGs, we removed expression of the m<sup>6</sup>Am-  
 162 methylase PCIF1 [20, 21] using PCIF1 knockout cells generated by CRISPR/Cas9 [20]. Then, we  
 163 tested if loss of m<sup>6</sup>Am by PCIF1 knockout could abrogate suppression of ISGs by FTO. To do  
 164 this, we depleted FTO in either parental 293T cells or in two independent clonal cell lines in which  
 165 the m<sup>6</sup>Am-methylase PCIF1 was removed by CRISPR/Cas9 [20]. Following IFN- $\beta$  treatment for  
 166 12 hours, we measured the expression of the FTO-regulated ISGs IFITM1 and IFIT3 by  
 167 immunoblot and found that the upregulation of IFITM1 and IFIT3 seen upon FTO depletion was

168 not altered by loss of PCIF1 expression (Figure 3A). These results reveal that FTO regulation of  
169 ISGs does not occur through m<sup>6</sup>Am modification of RNAs.

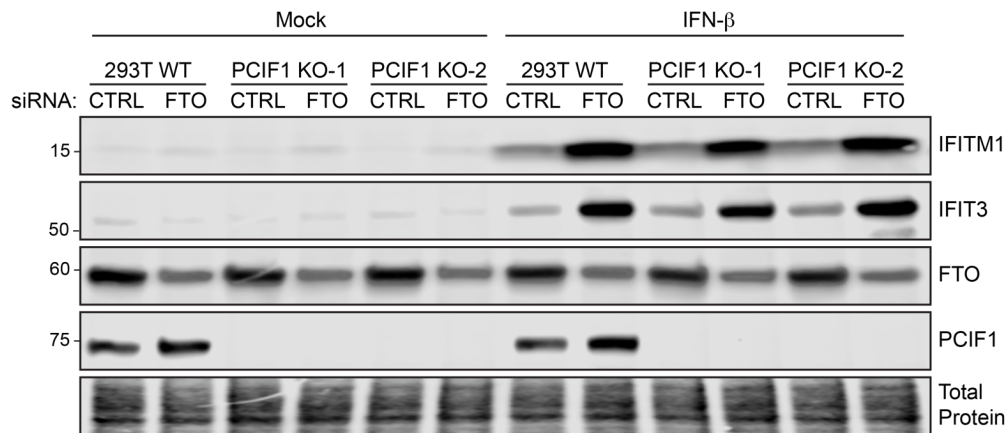

170

171 **Figure 3: FTO regulation of ISGs occurs independently of m<sup>6</sup>Am.** Immunoblot analysis of  
172 extracts from wild-type (WT) 293T cells or two clonal PCIF1 knockout cell lines transfected with  
173 siRNAs to control (CTRL) or FTO prior to mock or IFN-β (12 h) treatment. Data are representative  
174 of 3 biological experiments.

175 **FTO suppresses inflammatory gene expression.**

176 Having determined that FTO regulates the transcription of certain ISGs, we next sought  
177 to more broadly characterize the regulatory role of FTO during the type I IFN response. Using  
178 RNA-seq, we profiled gene expression in FTO-depleted cells, following mock treatment or IFN-β  
179 stimulation (8 hours) (Table S1). Genes regulated by FTO in mock-treated cells were enriched in  
180 biological categories such as RNA metabolism and gene expression, supporting the known role  
181 of FTO in RNA regulation, as well as immune categories such as response to IFN-γ and response  
182 to external biotic stimulus (Table S2.1) [12]. Gene ontology analysis of the genes significantly  
183 regulated by FTO (adjusted P < 0.01) during the IFN response revealed that FTO-regulated genes  
184 are enriched in biological categories related to immunity, defense responses, and cytokines  
185 (Figure 4A; Table S2.2. To determine the effect of FTO depletion on the IFN-induced expression  
186 of ISGs, we profiled the 300 most highly-induced ISGs that we had previously defined [5] (Figure  
187 4B; Table S1.1) and found that FTO depletion led to increased expression of a subset of these  
188 ISGs (Figure 4C; Table S1.2). Indeed, 140 of these ISGs were significantly regulated by FTO  
189 (adjusted P < 0.01) and of these 140, nearly all (136) were upregulated following FTO depletion,  
190 confirming that FTO is a suppressor of a distinct set of ISGs. While these ISGs are also induced  
191 following FTO depletion in the absence of IFN treatment (Figure 4D; Table S1.3), these effects  
192 were generally exacerbated by IFN-β treatment, as seen in a heatmap of the top 50 most highly-  
193 induced FTO-regulated ISGs (Figure 4E), further supporting the idea that FTO-depleted cells are

194 primed to respond to IFN- $\beta$ . The ISGs most highly upregulated by FTO depletion include the  
 195 proinflammatory chemokines *CXCL10* and *CXCL11* (Figure 4A). Indeed, our analysis of  
 196 proinflammatory gene expression revealed that FTO depletion generally led to an upregulation of  
 197 proinflammatory gene expression [32], with strong upregulation of the proinflammatory cytokines  
 198 *TNF* and *IL6* and the proinflammatory chemokines *CXCL9*, *CXCL10*, and *CXCL11* (Figure 4F).  
 199 Together, these results reveal that FTO negatively regulates a subset of ISGs, including many  
 200 proinflammatory genes.

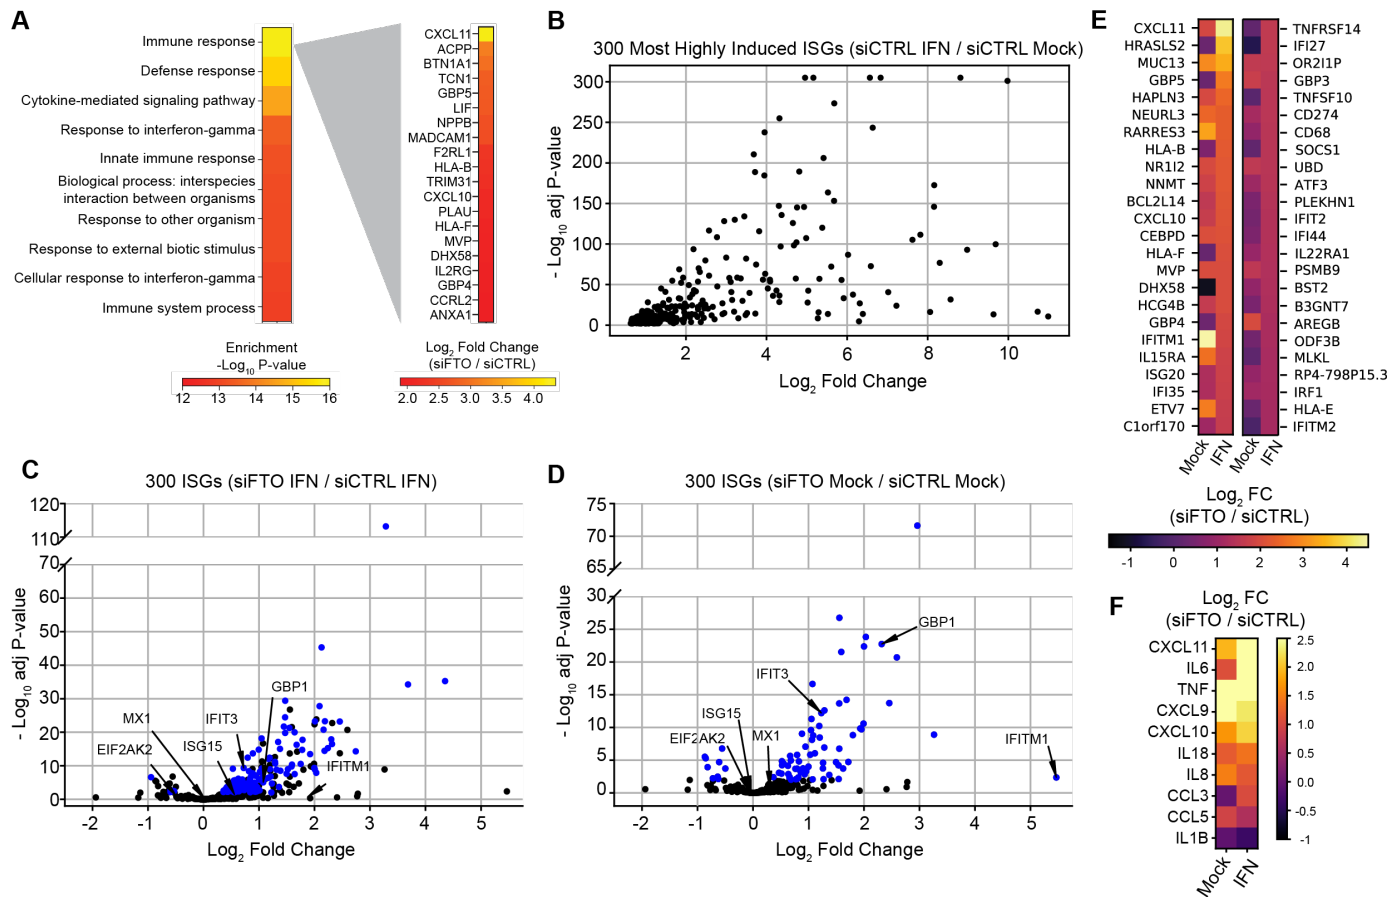

201  
 202 **Figure 4: FTO suppresses inflammatory gene expression.** RNA-seq analysis of Huh7 cells  
 203 treated with siRNAs to control (CTRL) or FTO (36 h), followed by mock or IFN- $\beta$  treatment (8 h).  
 204 **(A)** Gene ontology analysis of differentially expressed genes in IFN- $\beta$ -treated cells (siFTO /  
 205 siCTRL). Left panel shows biological categories and right panel shows differentially expressed  
 206 genes within the immune response category. **(B-D)** Volcano plots of the 300 most highly-  
 207 induced ISGs (adjP<0.01; basemean > 50) (A), and the effect of FTO depletion on these 300  
 208 ISGs (siFTO / siCTRL) in IFN- $\beta$  treated cells (B), or mock-treated cells (C). **(E)** Heatmap of the  
 209 effect of FTO depletion on the 50 most induced ISGs (siFTO / siCTRL) following mock and IFN-  
 210  $\beta$  treatment. **(F)** Heatmap of the effect of FTO depletion on canonical proinflammatory cytokines  
 211 and chemokines (siFTO / siCTRL).



212 **FTO suppresses STAT3 activation.**

213 Having found that FTO suppresses the transcription of only a subset of ISGs and that  
214 FTO-depleted cells are primed to respond to type I IFN, we hypothesized that FTO may regulate  
215 these ISGs through a transcription factor other than the canonical ISGF3 complex of STAT1,  
216 STAT2, and IRF9 [2]. Interestingly, FTO has previously been found to regulate the activation of  
217 the transcription factor STAT3 [33], which can drive transcriptional induction of proinflammatory  
218 gene expression and possibly certain ISGs [34, 35]. The activation of STAT3 requires its  
219 phosphorylation at the tyrosine 705 (Y705) residue [36]. Thus, to test if FTO negatively regulates  
220 STAT3 activation we measured phosphorylation of STAT3 at Y705 in METTL3/14- or FTO-  
221 depleted Huh7 cells by immunoblot. FTO depletion, but not METTL3/14 depletion, led to an  
222 increase in STAT3 phosphorylation, and this increase was similar in the presence or absence of  
223 IFN (Figure 5A). To determine if STAT3 activation is sufficient to induce FTO-regulated ISGs, we  
224 treated Huh7 cells with IL-6, which induces Y705 phosphorylation of STAT3 [30]. While IL-6 did  
225 induce Y705 phosphorylation of STAT3, it did not induce ISG expression, as measured by  
226 immunoblot. However, in conjunction with IFN- $\beta$  treatment, IL-6 did modestly enhance the  
227 expression of the FTO-regulated ISGs IFITM1 and IFIT3, but not ISG15 and EIF2AK2. These  
228 data suggest in the presence of IFN- $\beta$ , activation of STAT3 can recapitulate the effect of FTO  
229 depletion on ISG expression (Figure 5B). Additionally, STAT3 activation in Huh7 cells by  
230 expression of the *Salmonella* effector protein SarA, which is known to activate STAT3 [31],  
231 resulted in increased expression of IFITM1 and IFIT3, but not ISG15 and EIF2AK2, following both  
232 mock and IFN- $\beta$  treatment (Figure 5C), supporting our finding that STAT3 activation can regulate  
233 ISGs in a similar fashion to FTO depletion during the IFN response. To determine whether STAT3  
234 activation is responsible for the upregulation of ISGs that results from FTO depletion, we co-  
235 depleted FTO and STAT3 in Huh7 cells using siRNA. Depletion of STAT3 alone reduced the  
236 expression of IFITM1 and IFIT3, but not ISG15 and EIF2AK2 (Figure 5D). Importantly, STAT3  
237 depletion also partially ablated the effect of FTO depletion on IFITM1 and IFIT3 (Figure 5D).  
238 Together, these data reveal that FTO suppresses the expression of a subset of ISGs by inhibiting  
239 STAT3 activation.

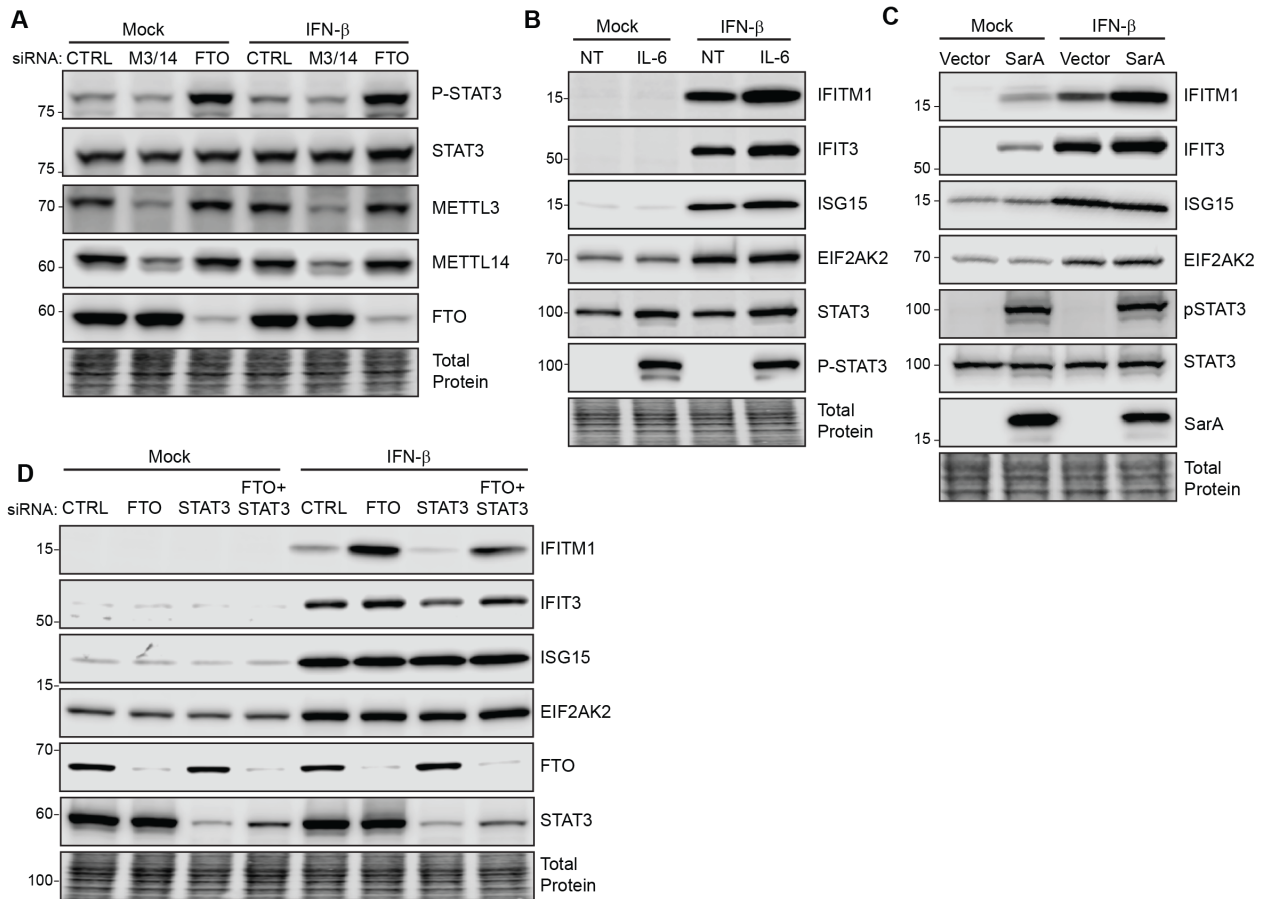

240

241 **Figure 5: FTO suppresses STAT3 activation.** (A) Immunoblot analysis of extracts from Huh7  
 242 cells transfected with siRNAs to control (CTRL), METTL3/14 (M3/14), or FTO prior to mock or  
 243 IFN- $\beta$  (12 h) treatment. (B) Immunoblot analysis of extracts from Huh7 treated with mock or IFN- $\beta$   
 244 plus IL-6 or no treatment (NT) for 12 h. (C) Immunoblot analysis of extracts from Huh7 cells  
 245 expressing SarA or vector (16 h), followed by IFN- $\beta$  (12 h) treatment. (D) Immunoblot analysis of  
 246 extracts from Huh7 cells transfected with siRNAs to control (CTRL), STAT3, FTO, or FTO and  
 247 STAT3 prior to mock or IFN- $\beta$  (12 h) treatment. Data in A-D are representative of 3 biological  
 248 experiments.

249

## 250 Discussion

251 We previously found that METTL3/14 and m<sup>6</sup>A facilitate the translation of a subset of m<sup>6</sup>A-  
 252 modified ISGs [5]. Given the m<sup>6</sup>A and m<sup>6</sup>Am demethylase activities of FTO, we hypothesized that  
 253 FTO could inhibit the translation of ISGs through demethylation of these modifications on the  
 254 transcripts of ISGs. However, here, we found that FTO suppresses signaling and transcriptional  
 255 activation of a subset of ISGs, including many that encode proinflammatory factors. This  
 256 regulatory function of FTO does not occur through its effect on m<sup>6</sup>Am, as the regulatory effect of  
 257 FTO on ISGs was intact in cells that do not express the m<sup>6</sup>Am methyltransferase PCIF1. As

258 genetic ablation of METTL3 is not tolerated by Huh7 and other cancer cell lines [37], we were  
259 unable to determine whether FTO regulation of ISGs is dependent on METTL3-mediated m<sup>6</sup>A  
260 modifications. However, we did find that the major mechanism by which FTO suppressed ISG  
261 expression was through its negative regulation of STAT3 activation, which induces specific  
262 classes of ISGs (Figure 5). Therefore, our data suggest that active STAT3 may act synergistically  
263 with ISGF3 at the promoters of certain ISGs. Given the association of FTO variants with  
264 inflammation-related diseases [6-9], these results increase our knowledge of the molecular roles  
265 of FTO in human diseases driven by inflammation. Additionally, our work establishes a novel role  
266 for FTO as a suppressor of ISGs, and thus defines a new control for the IFN response.

267         The role of STAT3 in the type I IFN response is unclear. The type I IFN response is  
268 typically driven by the ISGF3 transcription factor complex, which is composed of STAT1, STAT2,  
269 and IRF9. While this complex does not canonically include STAT3, STAT3 has been shown to be  
270 activated by type I IFN in certain cell types [4]. However, most functions of type I IFN signaling,  
271 such as antiviral gene expression and immune cell development, are independent of STAT3 [38-  
272 40]. In cell types in which STAT3 is activated in response to type I IFN, it has been show to  
273 function as either a positive or negative regulator of type I IFN signaling [4, 35, 41]. The  
274 mechanisms by which STAT3 may repress type I IFN signaling include sequestration of STAT1  
275 [41], cooperation with repressor proteins such as PLSCR2 [42], or induction of negative regulators  
276 of the JAK-STAT pathway, such as SOCS family proteins [43]. However, in addition to these  
277 repressive roles, STAT3 has been shown to support or enhance the expression of certain ISGs,  
278 such as OAS and MX2 [41], as well as CXCL11 [35], which we found to be among the highest  
279 upregulated genes by FTO depletion. Interestingly, in our experiments, STAT3 phosphorylation  
280 was not induced by IFN- $\beta$  treatment alone, but known STAT3 phosphorylation activators such as  
281 IL-6 and the Salmonella effector protein SarA induced expression of ISGs that are also increased  
282 by FTO depletion (Figure 5). These data suggest that STAT3 can activate the transcription of a  
283 subset of ISGs, as well as act synergistically with the ISGF3 transcription factor complex  
284 canonically activated by type I IFN to enhance the expression of these ISGs. As such, STAT3  
285 may be responsible for the transcriptional priming of ISGs that we observed following FTO  
286 depletion (Figure 2), although this effect seems to be transient for many ISGs, perhaps due to  
287 their eventual negative regulation [44]. Whether STAT3 directly promotes ISG transcription by  
288 binding to the promoters of these genes or by an indirect mechanism, as well as determining the  
289 cell type specificity of this STAT3-mediated regulation, will be an interesting direction for future  
290 research.

291 Previous studies have reported conflicting roles of FTO in regulation of STAT3 activation.  
292 In agreement with our findings, FTO overexpression in liver cells can decrease phosphorylation  
293 of STAT3 at Y705 and reduce its nuclear localization [33], suggesting that FTO suppresses  
294 STAT3 activation. However, other studies in adipocytes have suggested that FTO increases  
295 STAT3 activation by stabilizing the mRNA of *JAK2*, which encodes a known STAT3 kinase, to  
296 induce STAT3 phosphorylation at Y705 [45]. Therefore, molecular regulation between FTO and  
297 STAT3 is complex and may differ in specific cell types. However, given the role of FTO in  
298 regulation of mRNA expression, it is likely that FTO regulates the expression of one or more  
299 factors that govern STAT3 Y705 phosphorylation through regulation of m<sup>6</sup>A on specific transcripts.  
300 Indeed, our RNA-seq data revealed that *JAK2* mRNA expression was upregulated following FTO  
301 depletion. As *JAK2* encodes a kinase that can phosphorylate STAT3 at Y705 in response to IL6  
302 [46], it is possible that upregulation of *JAK2* expression is responsible for the increase in STAT3  
303 phosphorylation and activation observed following FTO depletion. While the m<sup>6</sup>Am demethylase  
304 function of FTO is not required for its regulation of ISGs, it is possible that it regulates one or  
305 several factors controlling STAT3 activation, such as *JAK2*, in an m<sup>6</sup>A demethylase-dependent  
306 fashion. Indeed, we previously found that *JAK2* mRNA is m<sup>6</sup>A-modified during the type I IFN  
307 response [5]. However, as FTO depletion may regulate the expression of multiple kinases or  
308 phosphatases that control STAT3 phosphorylation [47], additional targeted studies will be  
309 required for a more complete understanding of the mechanisms by which FTO regulates STAT3  
310 activation.

311 In summary, we found that FTO acts as a transcriptional suppressor of a subset of ISGs,  
312 including many genes encoding proinflammatory factors. This function of FTO is independent of  
313 its role as an m<sup>6</sup>Am demethylase and is mediated at least partially by suppression of STAT3  
314 activation. These results reveal a novel regulatory control over the type I IFN response and shed  
315 additional light on the molecular role of FTO in regulation of immune gene expression. As FTO  
316 and its substrate modifications m<sup>6</sup>A and m<sup>6</sup>Am can regulate viral infection through their effects on  
317 both viral and host RNAs [29, 48, 49], these results will help shape our understanding of the  
318 functions of FTO during viral infection. While previous studies have described associations  
319 between FTO and immune-related gene expression [27, 50], our work sheds additional light on  
320 the mechanisms by which FTO influences innate immune and proinflammatory gene expression.  
321 Further, this molecular role of FTO could have important implications for our understanding of the  
322 role of FTO in inflammation-related diseases, such as obesity and cancer. Thus, further  
323 exploration of the relationship between FTO, STAT3, and inflammatory gene expression in

324 immune cell subsets will be crucial for our understanding of the molecular functions of FTO in  
325 disease.

326

### 327 **Acknowledgements**

328 We thank colleagues who provided reagents (see Methods), the Duke Functional Genomics Core  
329 Facility, the Duke Center for Genomic and Computational Biology Core, Jeff Bourgeois and Dr.  
330 Kyle Gibbs, and Horner lab members for useful discussion. This work was supported by funds  
331 from Burroughs Wellcome Fund (S.M.H.), National Institutes of Health: R01AI125416, T32-  
332 CA009111 (M.J.M., M.T.S.), and a Duke MGM SURE Fellowship (K.A.M.).

333

### 334 **Author contributions**

335 Conceptualization: M.J.M., M.T.S., N.S.G., and S.M.H. Investigation: M.J.M., M.T.S.,  
336 N.S.G., and M.P. Formal analysis: M.J.M., M.T.S., K.A.M., N.S.G., and S.M.H. Software: K.A.M.,  
337 N.S.G., and K.Y.S. Writing – original draft: M.J.M. and S.M.H. Writing – review and editing: M.J.M.,  
338 M.T.S., K.A.M., N.S.G., K.Y.S., and S.M.H. Funding acquisition: S.M.H.

339

### 340 **Competing interests**

341 The authors have no competing interests to declare.

342

### 343 **Methods**

344 **Cell Lines.** Human hepatoma Huh7 cells and embryonic kidney 293T cells were grown in  
345 Dulbecco's modification of Eagle's medium (DMEM; Mediatech) supplemented with 10% fetal  
346 bovine serum (Thermo Fisher Scientific), 1X minimum essential medium non-essential amino  
347 acids (Thermo Fisher Scientific), and 25 mM HEPES (Thermo Fisher Scientific) (cDMEM). The  
348 identity of the Huh7 cells used in this study was verified by using the GenePrint STR kit (Promega)  
349 (DNA Analysis Facility, Duke University, Durham, NC, USA). Huh7 cells were a gift of Dr. Michael  
350 Gale Jr., and 293T cells (WT and PCIF1 KO) [20] were a gift of Dr. Eric Greer. All cell lines were  
351 verified as mycoplasma free by the LookOut Mycoplasma PCR detection kit (Sigma).

352

353 **IFN- $\beta$  and IL-6 Treatment.** All IFN- $\beta$  (PBL Assay Science) and IL-6 (Sigma-Aldrich) treatments  
354 were performed at a concentration of 50 units/mL and 50 ng/mL in cDMEM, respectively.

355

356 **Plasmids.** pcDNA3.1-FLAG-stm2585 (FLAG-SarA) and pcDNA3.1 empty vector plasmids [51]  
357 were gifts of Dr. Dennis Ko (Duke).

358

359 **Transfection.** siRNAs directed against METTL3 (SI04317096), METTL14 (SI00459942), FTO  
360 (SI04177530), STAT3 (M-003544-02) or non-targeting AllStars negative control siRNA (1027280)  
361 were purchased from Qiagen or Dharmacon. All siRNA transfections were performed using the  
362 Lipofectamine RNAiMax reagent (Invitrogen), according to manufacturer's instructions.  
363 siMETTL3/14 co-transfections were performed at a ratio of 1:2 siMETTL3:siMETTL14. Cells were  
364 transfected with 25 pmol of siRNA at a final concentration of 0.0125  $\mu$ M. Media was changed 4  
365 hours post-transfection, and cells were incubated for 36 hours post-transfection prior to each  
366 experimental treatment. Plasmid transfections were performed with 1  $\mu$ g of DNA per single well  
367 of a 6-well plate using PEI MAX (Polysciences, INC.) according to the manufacturer's instructions.  
368 Media was changed 4 hours post-transfection, and cells were incubated for 36 hours post-  
369 transfection prior to each experimental treatment.

370

371 **Immunoblotting.** Cells were lysed in a modified radioimmunoprecipitation assay (RIPA) buffer  
372 (10 mM Tris [pH 7.5], 150 mM NaCl, 0.5% sodium deoxycholate, and 1% Triton X-100)  
373 supplemented with protease inhibitor cocktail (Sigma) and phosphatase inhibitor cocktail II  
374 (Millipore), and post-nuclear lysates were harvested by centrifugation. Quantified protein  
375 (between 5 and 15  $\mu$ g) was added to a 4X SDS protein sample buffer (40% glycerol, 240 mM  
376 Tris-HCl [pH 6.8], 8% SDS, 0.04% bromophenol blue, 5% beta-mercaptoethanol), resolved by  
377 SDS/PAGE, and transferred to nitrocellulose membranes in a 25 mM Tris-192 mM glycine-0.01%  
378 SDS buffer. Membranes were stained with Revert 700 total protein stain (LI-COR Biosciences),  
379 then blocked in 3% bovine serum albumin. Membranes were incubated with primary antibodies  
380 for 2 hours at room temperature or overnight at 4°C. After washing with PBS-T buffer (1 $\times$  PBS,  
381 0.05% Tween 20), membranes were incubated with species-specific horseradish peroxidase-  
382 conjugated antibodies (Jackson ImmunoResearch, 1:5000) for 1 hour at room temperature,  
383 followed by treatment of the membrane with Clarity enhanced chemiluminescence (Bio-Rad) and  
384 imaging on an Odyssey Fc imaging system (LI-COR Biosciences). The following antibodies were  
385 used for immunoblotting: mouse anti-IFITM1 (Proteintech 60074-1-Ig, 1:1000; recognizes IFITM1  
386 but not IFITM2 or IFITM3 [52, 53]), rabbit anti-MX1 (Abcam ab207414, 1:1000), mouse anti-ISG15  
387 (Santa Cruz sc-166755, 1:5000), rabbit anti-EIF2AK2 (Abcam ab32506, 1:1000), rabbit anti-  
388 GBP1 (Abcam EPR8285), mouse anti-IFIT3 (Abcam ab76818), rabbit anti-METTL14 (Sigma  
389 HPA038002, 1:2500), mouse anti-METTL3 (Abnova H00056339-B01P, 1:1000), rabbit anti-FTO  
390 (Abcam EPR6895, 1:1000), mouse anti-FTO (Abcam ab92821, 1:2000), mouse anti-STAT3 (Cell  
391 Signaling Technologies 9139S, 1:2000), rabbit anti-phospho-STAT3 (Cell Signaling

392 Technologies, 1:2000), anti-PCIF (Bethyl Laboratory, 1:1000), mouse anti-FLAG-HRP (Sigma  
393 A8592, 1:5000).

394

395 **Quantification of Immunoblots.** Following imaging using the LI-COR Odyssey Fc, immunoblots  
396 were quantified using ImageStudio Lite software, and raw values were normalized to total protein  
397 (Revert 700 total protein stain) for each condition.

398

399 **RT-qPCR.** Total cellular RNA was extracted using the Qiagen RNeasy kit (Life Technologies) or  
400 TRIzol extraction (Thermo Fisher Scientific). RNA was then reverse transcribed using the iScript  
401 cDNA synthesis kit (Bio-Rad) as per the manufacturer's instructions. The resulting cDNA was  
402 diluted 1:5 in nuclease-free H<sub>2</sub>O. RT-qPCR was performed in triplicate using the Power SYBR  
403 Green PCR master mix (Thermo Fisher Scientific) and the Applied Biosystems Step One Plus or  
404 QuantStudio 6 Flex RT-PCR systems. Primer sequences for RT-qPCR are listed in Table 1.

405

406 **Table 1:** RT-qPCR Primer Sequences.

| Target         | Forward Primer (5'-3') | Reverse Primer (5'-3')  |
|----------------|------------------------|-------------------------|
| <i>GAPDH</i>   | AAGGTGAAGGTCGGAGTCAAC  | GGGGTCATTGATGGCAACAATA  |
| <i>HPRT1</i>   | TGACACTGGCAAACAATGCA   | GGTCCTTTTCACCAGCAAGCT   |
| <i>CREBBP</i>  | CTCAGCTGTGACCTCATGGA   | AGGTCGTAGTCCTCGCACAC    |
| <i>IFITM1</i>  | ACTAGTAGCCGCCCATAGCC   | GCACGTGCACTTTATTGAATG   |
| <i>MX1</i>     | TTCAGCACCTGATGGCCTATC  | TGGATGATCAAAGGGATGTGG   |
| <i>ISG15</i>   | GCGAACTCATCTTTGCCAGTA  | CCAGCA TCTTCACCGTCAG    |
| <i>EIF2AK2</i> | TCGCTGGTATCACTCGTCTG   | GATTCTGAAGACCGCCAGAG    |
| <i>GBP1</i>    | GTGGAACGTGTGAAAGCTGA   | CAACTGGACCCTGTCTGTTCT   |
| <i>IFIT3</i>   | AGTCTAGTCACTTGGGGAAAC  | ATAAATCTGAGCATCTGAGAGTC |
| <i>CXCL10</i>  | AGCAGAGGAACCTCCAGTCT   | ATGCAGGTACAGCGTACAGT    |

407

408 **Metabolic labeling of nascent transcripts with 4-sU.** siRNA-treated cells were pulsed with 4-  
409 sU at a final concentration of 200  $\mu$ M (-/+ IFN- $\beta$ ) for the indicated amount of time before harvest  
410 in TRIzol and RNA extraction. Purification of newly transcribed, 4-sU labeled RNA was performed  
411 as previously described [54]. Briefly, 50  $\mu$ g of RNA were biotinylated in biotinylation buffer (10 mM  
412 Tris-HCl pH 7.4, 1 mM EDTA, 20 ng/ $\mu$ l MTSEA Biotin-XX (Biotium)) for 30 minutes at room  
413 temperature, shaking at 800 rpm. A phenol/chloroform extraction was performed, and RNA was  
414 precipitated in isopropanol for 1 hour at -20°C. Following centrifugation for 20 minutes at 12000  
415 X g at 4°C, RNA was resuspended, and 20% of each sample was taken for input samples. The  
416 remaining RNA was then incubated with Streptavidin MyOne C1 Dynabeads (Thermo Fisher  
417 Scientific), which were prewashed with 0.1M NaCl, in streptavidin binding buffer (final

418 concentration 5 mM Tris-HCl pH 7.4, 0.5 mM EDTA, 1M NaCl) for 30 minutes at room  
419 temperature, shaking at 800 rpm. The supernatant containing unbound “pre-existing” RNA was  
420 then collected, and the beads were washed 4X with wash buffer (100 mM Tris-HCl pH 7.4, 10  
421 mM EDTA, 1M NaCl, 0.1% Tween-20), and each wash was collected. Two additional washes  
422 were performed, and supernatant was discarded. To elute biotinylated RNA, 100 mM DTT (freshly  
423 prepared) was added, and the supernatant was collected. This was repeated 3 times to collect all  
424 labeled RNA. Finally, both the “pre-existing” and “newly transcribed” fractions were precipitated  
425 in isopropanol for 1 hour at -20°C. Following centrifugation for 20 minutes at 12000 X g at 4°C,  
426 RNA was resuspended, and cDNA was synthesized for each RNA fraction using the iScript cDNA  
427 synthesis kit (BioRad). RT-qPCR was then performed for total and newly transcribed fractions  
428 and used to determine the relative transcription rate of genes of interest, compared to GAPDH.

429  
430 **RNA-seq.** Following siRNA treatment (36 hours), Huh7 cells seeded in 10-cm<sup>2</sup> plates were  
431 stimulated with IFN-β or mock treated (8 hours), then harvested and RNA extraction was  
432 performed using TRIzol reagent (Thermo Fisher Scientific). Samples were then treated with Turbo  
433 DNase I (Thermo Fisher Scientific) according to manufacturer protocol and incubated at 37°C for  
434 30 minutes, followed by phenol/chloroform extraction and ethanol precipitation overnight. RNA  
435 concentrations were then normalized. Sequencing libraries were prepared using the KAPA  
436 Stranded mRNA-Seq Kit (Roche) and sequenced on an Illumina HiSeq 4000 with 100 bp paired-  
437 end reads by the Duke University Center for Genomic and Computational Biology.

438 Reads were aligned using Salmon [55] to the human reference transcriptome using default  
439 parameters (hg19). Differential gene expression between infected and uninfected samples was  
440 compared using DESeq2 [56]. Gene ontology analyses were generated using the PANTHER  
441 Classification System’s statistical enrichment test with gene symbols and fold change values [57].  
442 The heatmaps were generated using Python scripts. We compared the effects of IFN-β and mock  
443 treatment in cells transfected with siCTRL to determine the most highly induced interferon  
444 stimulated genes based on adjusted P-value < 0.01 and a basemean > 50. To determine the  
445 effect of IFN-β treatment with FTO depletion, the log-transformed adjusted P-value and fold  
446 changes of the previously determined highly induced genes were plotted from the IFN-β and mock  
447 treatments using Python scripts. Heatmaps of the 50 most induced ISGs and pro-inflammatory  
448 chemokines and cytokines were generated using Python scripts.

449  
450 **Data Availability.** All raw data from RNA-seq are available through GEO (accession number:  
451 GSE180663).  
452



453 **Code Availability.** All RNA-seq analysis scripts are open-source or online on Github  
454 ([https://github.com/kristen-a-murphy/McFadden\\_siFTO\\_RNA-seq](https://github.com/kristen-a-murphy/McFadden_siFTO_RNA-seq)).

455

#### 456 **Supplemental Information**

457 Table S1: RNA-seq analysis of gene expression changes following IFN- $\beta$  treatment and FTO  
458 depletion.

459 • Table S1.1: siCTRL IFN / siCTRL Mock

460 • Table S1.2: siFTO IFN / siCTRL IFN

461 • Table S1.3: siFTO Mock / siCTRL Mock

462 Table S2: Gene Ontology analysis of RNA-seq data.

463 • Table S2.1: Enriched GO categories for differentially expressed genes (siFTO Mock /  
464 siCTRL Mock)

465 • Table S2.2: Enriched GO categories for differentially expressed genes (siFTO IFN /  
466 siCTRL IFN)

467

468

469 **References**

- 470 [1] Schoggins JW, Wilson SJ, Panis M, Murphy MY, Jones CT, Bieniasz P, et al. A diverse  
471 range of gene products are effectors of the type I interferon antiviral response. *Nature*.  
472 2011;472:481-5.
- 473 [2] Stark GR, Darnell JE, Jr. The JAK-STAT pathway at twenty. *Immunity*. 2012;36:503-14.
- 474 [3] Schneider WM, Chevillotte MD, Rice CM. Interferon-stimulated genes: a complex web of  
475 host defenses. *Annu Rev Immunol*. 2014;32:513-45.
- 476 [4] Tsai MH, Pai LM, Lee CK. Fine-Tuning of Type I Interferon Response by STAT3. *Front*  
477 *Immunol*. 2019;10:1448.
- 478 [5] McFadden MJ, McIntyre ABR, Mourelatos H, Abell NS, Gokhale NS, Ipas H, et al. Post-  
479 transcriptional regulation of antiviral gene expression by N6-methyladenosine. *Cell Rep*.  
480 2021;34:108798.
- 481 [6] Frayling TM, Timpson NJ, Weedon MN, Zeggini E, Freathy RM, Lindgren CM, et al. A  
482 common variant in the FTO gene is associated with body mass index and predisposes to  
483 childhood and adult obesity. *Science*. 2007;316:889-94.
- 484 [7] Dina C, Meyre D, Gallina S, Durand E, Körner A, Jacobson P, et al. Variation in FTO  
485 contributes to childhood obesity and severe adult obesity. *Nat Genet*. 2007;39:724-6.
- 486 [8] Speliotes EK, Willer CJ, Berndt SI, Monda KL, Thorleifsson G, Jackson AU, et al.  
487 Association analyses of 249,796 individuals reveal 18 new loci associated with body mass  
488 index. *Nat Genet*. 2010;42:937-48.
- 489 [9] Olza J, Ruperez AI, Gil-Campos M, Leis R, Fernandez-Orth D, Tojo R, et al. Influence of  
490 FTO variants on obesity, inflammation and cardiovascular disease risk biomarkers in Spanish  
491 children: a case-control multicentre study. *BMC Med Genet*. 2013;14:123.
- 492 [10] Boissel S, Reish O, Proulx K, Kawagoe-Takaki H, Sedgwick B, Yeo GS, et al. Loss-of-  
493 function mutation in the dioxygenase-encoding FTO gene causes severe growth retardation and  
494 multiple malformations. *Am J Hum Genet*. 2009;85:106-11.
- 495 [11] Gerken T, Girard CA, Tung YC, Webby CJ, Saudek V, Hewitson KS, et al. The obesity-  
496 associated FTO gene encodes a 2-oxoglutarate-dependent nucleic acid demethylase. *Science*.  
497 2007;318:1469-72.
- 498 [12] Jia G, Fu Y, Zhao X, Dai Q, Zheng G, Yang Y, et al. N6-methyladenosine in nuclear RNA is  
499 a major substrate of the obesity-associated FTO. *Nat Chem Biol*. 2011;7:885-7.
- 500 [13] Zheng G, Dahl JA, Niu Y, Fedorcsak P, Huang CM, Li CJ, et al. ALKBH5 is a mammalian  
501 RNA demethylase that impacts RNA metabolism and mouse fertility. *Mol Cell*. 2013;49:18-29.
- 502 [14] Mauer J, Luo X, Blanjoie A, Jiao X, Grozhik AV, Patil DP, et al. Reversible methylation of  
503 m(6)A(m) in the 5' cap controls mRNA stability. *Nature*. 2017;541:371-5.
- 504 [15] Liu J, Yue Y, Han D, Wang X, Fu Y, Zhang L, et al. A METTL3-METTL14 complex  
505 mediates mammalian nuclear RNA N6-adenosine methylation. *Nat Chem Biol*. 2014;10:93-5.

- 506 [16] Wang X, Lu Z, Gomez A, Hon GC, Yue Y, Han D, et al. N6-methyladenosine-dependent  
507 regulation of messenger RNA stability. *Nature*. 2014;505:117-20.
- 508 [17] Wang X, Zhao BS, Roundtree IA, Lu Z, Han D, Ma H, et al. N(6)-methyladenosine  
509 Modulates Messenger RNA Translation Efficiency. *Cell*. 2015;161:1388-99.
- 510 [18] Shi H, Wang X, Lu Z, Zhao BS, Ma H, Hsu PJ, et al. YTHDF3 facilitates translation and  
511 decay of N(6)-methyladenosine-modified RNA. *Cell Res*. 2017;27:315-28.
- 512 [19] He L, Li H, Wu A, Peng Y, Shu G, Yin G. Functions of N6-methyladenosine and its role in  
513 cancer. *Mol Cancer*. 2019;18:176.
- 514 [20] Boulias K, Toczyłowska-Socha D, Hawley BR, Liberman N, Takashima K, Zaccara S, et  
515 al. Identification of the m(6)Am Methyltransferase PCIF1 Reveals the Location and Functions of  
516 m(6)Am in the Transcriptome. *Mol Cell*. 2019;75:631-43.e8.
- 517 [21] Akichika S, Hirano S, Shichino Y, Suzuki T, Nishimasu H, Ishitani R, et al. Cap-specific  
518 terminal N (6)-methylation of RNA by an RNA polymerase II-associated methyltransferase.  
519 *Science*. 2019;363.
- 520 [22] Sendinc E, Valle-Garcia D, Dhall A, Chen H, Henriques T, Navarrete-Perea J, et al. PCIF1  
521 Catalyzes m6Am mRNA Methylation to Regulate Gene Expression. *Mol Cell*. 2019;75:620-  
522 30.e9.
- 523 [23] Li L, Zang L, Zhang F, Chen J, Shen H, Shu L, et al. Fat mass and obesity-associated  
524 (FTO) protein regulates adult neurogenesis. *Hum Mol Genet*. 2017;26:2398-411.
- 525 [24] Hess ME, Hess S, Meyer KD, Verhagen LA, Koch L, Brönneke HS, et al. The fat mass and  
526 obesity associated gene (Fto) regulates activity of the dopaminergic midbrain circuitry. *Nat*  
527 *Neurosci*. 2013;16:1042-8.
- 528 [25] Karra E, O'Daly OG, Choudhury AI, Yousseif A, Millership S, Neary MT, et al. A link  
529 between FTO, ghrelin, and impaired brain food-cue responsiveness. *J Clin Invest*. 2013;123:3539-  
530 51.
- 531 [26] Zhao X, Yang Y, Sun BF, Shi Y, Yang X, Xiao W, et al. FTO-dependent demethylation of  
532 N6-methyladenosine regulates mRNA splicing and is required for adipogenesis. *Cell Res*.  
533 2014;24:1403-19.
- 534 [27] Li Z, Weng H, Su R, Weng X, Zuo Z, Li C, et al. FTO Plays an Oncogenic Role in Acute  
535 Myeloid Leukemia as a N(6)-Methyladenosine RNA Demethylase. *Cancer Cell*. 2017;31:127-41.
- 536 [28] Yang S, Wei J, Cui YH, Park G, Shah P, Deng Y, et al. m(6)A mRNA demethylase FTO  
537 regulates melanoma tumorigenicity and response to anti-PD-1 blockade. *Nat Commun*.  
538 2019;10:2782.
- 539 [29] Williams GD, Gokhale NS, Horner SM. Regulation of Viral Infection by the RNA  
540 Modification N6-Methyladenosine. *Annu Rev Virol*. 2019;6:235-53.
- 541 [30] Heinrich PC, Behrmann I, Haan S, Hermanns HM, Müller-Newen G, Schaper F. Principles  
542 of interleukin (IL)-6-type cytokine signalling and its regulation. *Biochem J*. 2003;374:1-20.

- 543 [31] Gibbs KD, Washington EJ, Jaslow SL, Bourgeois JS, Foster MW, Guo R, et al. The  
544 Salmonella Secreted Effector SarA/SteE Mimics Cytokine Receptor Signaling to Activate  
545 STAT3. *Cell Host Microbe*. 2020;27:129-39.e4.
- 546 [32] Turner MD, Nedjai B, Hurst T, Pennington DJ. Cytokines and chemokines: At the  
547 crossroads of cell signalling and inflammatory disease. *Biochim Biophys Acta*. 2014;1843:2563-  
548 82.
- 549 [33] Bravard A, Vial G, Chauvin MA, Rouillé Y, Bailleul B, Vidal H, et al. FTO contributes to  
550 hepatic metabolism regulation through regulation of leptin action and STAT3 signalling in liver.  
551 *Cell Commun Signal*. 2014;12:4.
- 552 [34] Carpenter RL, Lo HW. STAT3 Target Genes Relevant to Human Cancers. *Cancers (Basel)*.  
553 2014;6:897-925.
- 554 [35] Yang CH, Wei L, Pfeffer SR, Du Z, Murti A, Valentine WJ, et al. Identification of CXCL11 as  
555 a STAT3-dependent gene induced by IFN. *J Immunol*. 2007;178:986-92.
- 556 [36] Minami M, Inoue M, Wei S, Takeda K, Matsumoto M, Kishimoto T, et al. STAT3 activation  
557 is a critical step in gp130-mediated terminal differentiation and growth arrest of a myeloid cell  
558 line. *Proc Natl Acad Sci U S A*. 1996;93:3963-6.
- 559 [37] Lin S, Choe J, Du P, Triboulet R, Gregory RI. The m(6)A Methyltransferase METTL3  
560 Promotes Translation in Human Cancer Cells. *Mol Cell*. 2016;62:335-45.
- 561 [38] Gimeno R, Lee CK, Schindler C, Levy DE. Stat1 and Stat2 but not Stat3 arbitrate  
562 contradictory growth signals elicited by alpha/beta interferon in T lymphocytes. *Mol Cell Biol*.  
563 2005;25:5456-65.
- 564 [39] Horvath CM, Darnell JE, Jr. The antiviral state induced by alpha interferon and gamma  
565 interferon requires transcriptionally active Stat1 protein. *J Virol*. 1996;70:647-50.
- 566 [40] Nakayamada S, Poholek AC, Lu KT, Takahashi H, Kato M, Iwata S, et al. Type I IFN  
567 induces binding of STAT1 to Bcl6: divergent roles of STAT family transcription factors in the T  
568 follicular helper cell genetic program. *J Immunol*. 2014;192:2156-66.
- 569 [41] Ho HH, Ivashkiv LB. Role of STAT3 in type I interferon responses. Negative regulation of  
570 STAT1-dependent inflammatory gene activation. *J Biol Chem*. 2006;281:14111-8.
- 571 [42] Tsai MH, Lee CK. STAT3 Cooperates With Phospholipid Scramblase 2 to Suppress Type I  
572 Interferon Response. *Front Immunol*. 2018;9:1886.
- 573 [43] Qin H, Niyongere SA, Lee SJ, Baker BJ, Benveniste EN. Expression and functional  
574 significance of SOCS-1 and SOCS-3 in astrocytes. *J Immunol*. 2008;181:3167-76.
- 575 [44] Croker BA, Kiu H, Nicholson SE. SOCS regulation of the JAK/STAT signalling pathway.  
576 *Semin Cell Dev Biol*. 2008;19:414-22.
- 577 [45] Wu R, Guo G, Bi Z, Liu Y, Zhao Y, Chen N, et al. m(6)A methylation modulates  
578 adipogenesis through JAK2-STAT3-C/EBP $\beta$  signaling. *Biochim Biophys Acta Gene Regul  
579 Mech*. 2019;1862:796-806.

- 580 [46] Hirano T. Interleukin 6 and its receptor: ten years later. *Int Rev Immunol.* 1998;16:249-84.
- 581 [47] Parri E, Kuusanmäki H, van Adrichem AJ, Kaustio M, Wennerberg K. Identification of novel  
582 regulators of STAT3 activity. *PLoS One.* 2020;15:e0230819.
- 583 [48] McFadden MJ, Horner SM. N(6)-Methyladenosine Regulates Host Responses to Viral  
584 Infection. *Trends Biochem Sci.* 2021;46:366-77.
- 585 [49] Tartell MA, Boulias K, Hoffmann GB, Bloyet L-M, Greer EL, Whelan SPJ. Methylation of  
586 viral mRNA cap structures by PCIF1 attenuates the antiviral activity of interferon- $\beta$ . *Proceedings*  
587 *of the National Academy of Sciences.* 2021;118.
- 588 [50] Rong ZX, Li Z, He JJ, Liu LY, Ren XX, Gao J, et al. Downregulation of Fat Mass and  
589 Obesity Associated (FTO) Promotes the Progression of Intrahepatic Cholangiocarcinoma. *Front*  
590 *Oncol.* 2019;9:369.
- 591 [51] Jaslow SL, Gibbs KD, Fricke WF, Wang L, Pittman KJ, Mammel MK, et al. Salmonella  
592 Activation of STAT3 Signaling by SarA Effector Promotes Intracellular Replication and  
593 Production of IL-10. *Cell Rep.* 2018;23:3525-36.
- 594 [52] Xie M, Xuan B, Shan J, Pan D, Sun Y, Shan Z, et al. Human cytomegalovirus exploits  
595 interferon-induced transmembrane proteins to facilitate morphogenesis of the virion assembly  
596 compartment. *J Virol.* 2015;89:3049-61.
- 597 [53] Shi G, Ozog S, Torbett BE, Compton AA. mTOR inhibitors lower an intrinsic barrier to virus  
598 infection mediated by IFITM3. *Proc Natl Acad Sci U S A.* 2018;115:E10069-e78.
- 599 [54] Dölken L, Ruzsics Z, Rädle B, Friedel CC, Zimmer R, Mages J, et al. High-resolution gene  
600 expression profiling for simultaneous kinetic parameter analysis of RNA synthesis and decay.  
601 *RNA.* 2008;14:1959-72.
- 602 [55] Patro R, Duggal G, Love MI, Irizarry RA, Kingsford C. Salmon provides fast and bias-aware  
603 quantification of transcript expression. *Nat Methods.* 2017;14:417-9.
- 604 [56] Love MI, Huber W, Anders S. Moderated estimation of fold change and dispersion for RNA-  
605 seq data with DESeq2. *Genome Biol.* 2014;15:550.
- 606 [57] Mi H, Ebert D, Muruganujan A, Mills C, Albou LP, Mushayamaha T, et al. PANTHER  
607 version 16: a revised family classification, tree-based classification tool, enhancer regions and  
608 extensive API. *Nucleic Acids Res.* 2021;49:D394-d403.
- 609
- 610
